# Supplementary material for: Genomic Data Reveal the Genetic Variation among Natural Mangifera Casturi Kosterm. Hybrids, an Underutilized Fruit Tree Under ‘Extinct in Wild’ Status from Kalimantan Selatan, Indonesia
Source: Research Square preprint supplement (doi:10.21203/rs.3.rs-258288/v1), 2021-03-03
Supplement: Supplementary file 1 [file c5842ccccb7c245b2c49b5bf.xlsx]

## Sheet: List of Species
Title : Genomic data reveal the genetic variation among natural Mangifera casturi Kosterm. hybrids, an underutilized fruit tree under ‘extinct in wild’ status from Kalimantan Selatan, Indonesia
Authors : Deden Derajat Matra, Muh Agust Nur Fathoni, Muhamad Majiidu, Hanif Wicaksono, Agung Sriyono, Gunawan, Hilda Susanti, Rismita Sari, Fitmawati, Iskandar Zulkarnaen Siregar, Roedhy Poerwanto
Supplementary Table 1 : List of species used in this study
No.	Local Name	Species	Origin	Deposition	Number of Deposition	GPS Coordinates
1	Kasturi	M. casturi	Banjar, South Kalimantan, Indonesia	Deposited in Banua Botanical Garden, received by Agung Sriyono	NA	S 3° 21' 45.883'', E 114° 52' 2.833''
2	Mawar	M. casturi	Banjar, South Kalimantan, Indonesia	Deposited in Banua Botanical Garden, received by Agung Sriyono	NA	S 3° 22' 40.461'', E 114° 53' 45.843''
3	Pelipisan	M. casturi	Banjar, South Kalimantan, Indonesia	Deposited in Banua Botanical Garden, received by Agung Sriyono	NA	S 3° 22' 40.461'', E 114° 53' 45.843''
4	Pinari	M. casturi	Banjar, South Kalimantan, Indonesia	Deposited in Banua Botanical Garden, received by Agung Sriyono	NA	S 3° 20' 41.482'', E 114° 55' 15.061''
5	Hambawang	M. foetida	Banjar, South Kalimantan, Indonesia	Deposited in Banua Botanical Garden, received by Agung Sriyono	NA	S 3° 22' 40.461'', E 114° 53' 45.843''
6	Mango	M. indica	Dramaga, Bogor, Indonesia	Deposited in Bogor Botanic Garden, received by Rismita Sari	NA	S 6° 33' 13.262'', E 106° 43' 21.81''
7	Rawa-rawa	M. similis	Banua Botanical Garden, Banjarbaru, South Kalimantan, Indonesia	Living collection in Banua Botanical Garden	No. 039/D2020020039	S 3° 29' 22.376'', E 114° 48' 59.719''
8	Asam Kumbang	M. quadrifida	Banua Botanical Garden, Banjarbaru, South Kalimantan, Indonesia	Living collection in Banua Botanical Garden	No. 069/D2020020069	S 3° 29' 22.376'', E 114° 48' 59.719''
